# Supplementary material for: Highly asymmetric rice genomes
Source: PubMed Central journal article supplement (PMC1914357; doi:10.1186/1471-2164-8-154), 2007-06-08
Supplement: 1471-2164-8-154-S1.pdf [file 1471-2164-8-154-S1.pdf]

**Table S1: Asymmetric genes on chromosome 10, aligned contigs and four gene families.**

| Number of gene or<br>contig                 | type of<br>Asymmetric<br>genes | Chromo<br>-some | GO Categories or<br>function | Single or<br>multigene<br>family | Single or<br>clustered<br>locus |
|---------------------------------------------|--------------------------------|-----------------|------------------------------|----------------------------------|---------------------------------|
| <b>Genes on chromosome 10 of Nipponbare</b> |                                |                 |                              |                                  |                                 |
| LOC_Os10g03680                              | PA                             | 10              | C <sup>a</sup>               | single                           | non-cluster                     |
| LOC_Os10g08050                              | PA                             | 10              | C&P                          | single                           | non-cluster                     |
| LOC_Os10g05560                              | PA                             | 10              | F&P                          | single                           | non-cluster                     |
| LOC_Os10g03580                              | PA                             | 10              | unknown                      | single                           | non-cluster                     |
| LOC_Os10g04650                              | PA                             | 10              | C&F&P                        | single                           | non-cluster                     |
| LOC_Os10g37000                              | PA                             | 10              | unknown                      | single                           | non-cluster                     |
| LOC_Os10g36300                              | PA                             | 10              | unknown                      | single                           | non-cluster                     |
| LOC_Os10g04630                              | PA                             | 10              | unknown                      | single                           | non-cluster                     |
| LOC_Os10g04670                              | PA                             | 10              | F&P                          | single                           | non-cluster                     |
| LOC_Os10g02720                              | PA                             | 10              | C&F&P                        | single                           | non-cluster                     |
| LOC_Os10g42930                              | PA                             | 10              | unknown                      | single                           | non-cluster                     |
| LOC_Os10g30320                              | PA                             | 10              | C                            | single                           | non-cluster                     |
| LOC_Os10g41840                              | PA                             | 10              | C                            | multigene                        | non-cluster                     |
| LOC_Os10g03500                              | PA                             | 10              | C                            | single                           | non-cluster                     |
| LOC_Os10g36330                              | PA                             | 10              | C                            | single                           | non-cluster                     |
| LOC_Os10g06150                              | PA                             | 10              | unknown                      | single                           | non-cluster                     |
| LOC_Os10g03100                              | PA                             | 10              | F                            | single                           | non-cluster                     |
| LOC_Os10g20360                              | PA                             | 10              | unknown                      | single                           | non-cluster                     |
| LOC_Os10g04660                              | PA                             | 10              | unknown                      | single                           | non-cluster                     |
| LOC_Os10g29440                              | PA                             | 10              | F                            | single                           | non-cluster                     |
| LOC_Os10g02890                              | PA                             | 10              | C&P                          | single                           | non-cluster                     |
| LOC_Os10g12190                              | PA                             | 10              | C                            | single                           | non-cluster                     |
| LOC_Os10g22710                              | PA                             | 10              | C                            | single                           | non-cluster                     |
| LOC_Os10g07050                              | PA                             | 10              | C                            | single                           | non-cluster                     |
| LOC_Os10g25370                              | PA                             | 10              | C&F&P                        | single                           | non-cluster                     |
| LOC_Os10g41990                              | PA                             | 10              | C&P                          | single                           | non-cluster                     |
| LOC_Os10g34010                              | PA                             | 10              | C&F&P                        | single                           | non-cluster                     |
| LOC_Os10g09200                              | PA                             | 10              | C                            | single                           | non-cluster                     |
| LOC_Os10g02270                              | PA                             | 10              | unknown                      | single                           | non-cluster                     |
| LOC_Os10g01340                              | PA                             | 10              | C&F&P                        | single                           | non-cluster                     |
| LOC_Os10g05770                              | PA                             | 10              | C                            | single                           | non-cluster                     |
| LOC_Os10g26450                              | PA                             | 10              | C&F&P                        | single                           | non-cluster                     |
| LOC_Os10g05890                              | PA                             | 10              | C                            | single                           | non-cluster                     |
| LOC_Os10g09560                              | PA                             | 10              | unknown                      | single                           | non-cluster                     |
| LOC_Os10g29350                              | PA                             | 10              | C                            | single                           | non-cluster                     |
| LOC_Os10g37090                              | PA                             | 10              | unknown                      | single                           | non-cluster                     |

|                |    |    |         |           |             |
|----------------|----|----|---------|-----------|-------------|
| LOC_Os10g31260 | PA | 10 | C&F&P   | single    | non-cluster |
| LOC_Os10g31300 | PA | 10 | C       | single    | non-cluster |
| LOC_Os10g29430 | PA | 10 | unknown | single    | non-cluster |
| LOC_Os10g35500 | PA | 10 | F       | single    | non-cluster |
| LOC_Os10g29410 | PA | 10 | F       | single    | non-cluster |
| LOC_Os10g10140 | PA | 10 | C       | single    | non-cluster |
| LOC_Os10g33070 | PA | 10 | C       | single    | non-cluster |
| LOC_Os10g04210 | PA | 10 | F       | single    | non-cluster |
| LOC_Os10g36970 | PA | 10 | C&F&P   | single    | non-cluster |
| LOC_Os10g09360 | PA | 10 | F       | single    | non-cluster |
| LOC_Os10g03510 | PA | 10 | unknown | single    | non-cluster |
| LOC_Os10g12040 | PA | 10 | C       | single    | non-cluster |
| LOC_Os10g20870 | PA | 10 | F&P     | single    | non-cluster |
| LOC_Os10g03590 | PA | 10 | unknown | single    | non-cluster |
| LOC_Os10g02330 | PA | 10 | unknown | single    | non-cluster |
| LOC_Os10g04680 | PA | 10 | unknown | single    | non-cluster |
| LOC_Os10g07280 | PA | 10 | C       | single    | non-cluster |
| LOC_Os10g27000 | PA | 10 | F&P     | single    | non-cluster |
| LOC_Os10g33100 | PA | 10 | C       | single    | non-cluster |
| LOC_Os10g08170 | PA | 10 | C       | multigene | non-cluster |
| LOC_Os10g11100 | AL | 10 | C       | multigene | non-cluster |
| LOC_Os10g09150 | AL | 10 | C       | multigene | non-cluster |
| LOC_Os10g24930 | AL | 10 | C       | multigene | non-cluster |
| LOC_Os10g03410 | AL | 10 | C       | single    | non-cluster |
| LOC_Os10g34230 | AL | 10 | C       | single    | non-cluster |
| LOC_Os10g34260 | AL | 10 | C       | single    | non-cluster |
| LOC_Os10g30690 | AL | 10 | C       | single    | non-cluster |
| LOC_Os10g34250 | AL | 10 | C&P     | multigene | non-cluster |
| LOC_Os10g04360 | AL | 10 | F       | multigene | non-cluster |
| LOC_Os10g05830 | AL | 10 | unknown | multigene | cluster     |
| LOC_Os10g04380 | AL | 10 | unknown | single    | non-cluster |
| LOC_Os10g16930 | AL | 10 | unknown | single    | non-cluster |
| LOC_Os10g05900 | AL | 10 | unknown | multigene | non-cluster |
| LOC_Os10g16890 | AL | 10 | unknown | single    | non-cluster |
| LOC_Os10g05610 | AL | 10 | unknown | single    | non-cluster |
| LOC_Os10g29250 | AL | 10 | unknown | single    | non-cluster |
| LOC_Os10g42040 | AL | 10 | unknown | single    | non-cluster |
| LOC_Os10g30700 | AL | 10 | unknown | single    | non-cluster |
| LOC_Os10g35900 | AL | 10 | unknown | multigene | non-cluster |
| LOC_Os10g34240 | AL | 10 | unknown | single    | non-cluster |
| LOC_Os10g34280 | AL | 10 | unknown | multigene | non-cluster |
| LOC_Os10g26820 | AL | 10 | unknown | single    | non-cluster |
| LOC_Os10g20640 | AL | 10 | unknown | multigene | non-cluster |
| LOC_Os10g26790 | AL | 10 | unknown | single    | non-cluster |

|                |                 |    |         |           |             |
|----------------|-----------------|----|---------|-----------|-------------|
| LOC_Os10g40240 | AL              | 10 | unknown | multigene | non-cluster |
| LOC_Os10g26440 | AL              | 10 | unknown | single    | non-cluster |
| LOC_Os10g34270 | AL              | 10 | C       | single    | non-cluster |
| LOC_Os10g12620 | AL              | 10 | C&F     | single    | non-cluster |
| LOC_Os10g09240 | AL              | 10 | C&F     | single    | non-cluster |
| LOC_Os10g01570 | AL              | 10 | C&F&P   | single    | non-cluster |
| LOC_Os10g05160 | AL              | 10 | C&F&P   | single    | non-cluster |
| LOC_Os10g03420 | AL              | 10 | C&F&P   | multigene | non-cluster |
| LOC_Os10g05630 | AL              | 10 | C&F&P   | single    | non-cluster |
| LOC_Os10g05170 | AL              | 10 | C&F&P   | single    | non-cluster |
| LOC_Os10g01580 | AL              | 10 | C&F&P   | single    | non-cluster |
| LOC_Os10g04100 | AL              | 10 | C&F&P   | multigene | non-cluster |
| LOC_Os10g34870 | AL              | 10 | C&F&P   | multigene | non-cluster |
| LOC_Os10g18030 | AL              | 10 | C&F&P   | single    | non-cluster |
| LOC_Os10g34220 | AL              | 10 | C&F&P   | multigene | non-cluster |
| LOC_Os10g34300 | AL              | 10 | C&F&P   | single    | non-cluster |
| LOC_Os10g36310 | AL              | 10 | C&F&P   | single    | non-cluster |
| LOC_Os10g05410 | AL              | 10 | C&P     | multigene | cluster     |
| LOC_Os10g05180 | AL              | 10 | C&P     | single    | non-cluster |
| LOC_Os10g24900 | AL              | 10 | F       | single    | non-cluster |
| LOC_Os10g34310 | AL              | 10 | F       | single    | non-cluster |
| LOC_Os10g26940 | AL              | 10 | F       | single    | non-cluster |
| LOC_Os10g05600 | AL              | 10 | F&P     | multigene | non-cluster |
| LOC_Os10g13380 | AL              | 10 | F&P     | single    | non-cluster |
| LOC_Os10g04370 | AL              | 10 | P       | single    | non-cluster |
| LOC_Os10g02590 | PA <sub>d</sub> | 10 | unknown | multigene | non-cluster |
| LOC_Os10g07060 | PA <sub>d</sub> | 10 | C       | multigene | non-cluster |
| LOC_Os10g10740 | PA <sub>d</sub> | 10 | C       | multigene | non-cluster |
| LOC_Os10g11610 | PA <sub>d</sub> | 10 | C       | multigene | non-cluster |
| LOC_Os10g40560 | PA <sub>d</sub> | 10 | C       | multigene | non-cluster |
| LOC_Os10g03890 | PA <sub>d</sub> | 10 | C       | multigene | non-cluster |
| LOC_Os10g29040 | PA <sub>d</sub> | 10 | C       | multigene | non-cluster |
| LOC_Os10g03520 | PA <sub>d</sub> | 10 | C       | multigene | non-cluster |
| LOC_Os10g40770 | PA <sub>d</sub> | 10 | C       | multigene | non-cluster |
| LOC_Os10g25730 | PA <sub>d</sub> | 10 | C       | multigene | non-cluster |
| LOC_Os10g08640 | PA <sub>d</sub> | 10 | C       | multigene | non-cluster |
| LOC_Os10g04200 | PA <sub>d</sub> | 10 | C       | multigene | non-cluster |
| LOC_Os10g04350 | PA <sub>d</sub> | 10 | C       | multigene | non-cluster |
| LOC_Os10g30980 | PA <sub>d</sub> | 10 | C       | multigene | non-cluster |
| LOC_Os10g07130 | PA <sub>d</sub> | 10 | C       | multigene | non-cluster |
| LOC_Os10g30970 | PA <sub>d</sub> | 10 | C       | multigene | non-cluster |
| LOC_Os10g02680 | PA <sub>d</sub> | 10 | C&F&P   | multigene | non-cluster |
| LOC_Os10g24950 | PA <sub>d</sub> | 10 | C&P     | multigene | non-cluster |
| LOC_Os10g11590 | PA <sub>d</sub> | 10 | C&P     | multigene | non-cluster |

|                |                 |    |         |           |             |
|----------------|-----------------|----|---------|-----------|-------------|
| LOC_Os10g10750 | PA <sub>d</sub> | 10 | C&P     | multigene | non-cluster |
| LOC_Os10g02870 | PA <sub>d</sub> | 10 | C&P     | multigene | non-cluster |
| LOC_Os10g18700 | PA <sub>d</sub> | 10 | C&P     | multigene | non-cluster |
| LOC_Os10g03390 | PA <sub>d</sub> | 10 | F&P     | multigene | cluster     |
| LOC_Os10g11600 | PA <sub>d</sub> | 10 | unknown | multigene | non-cluster |
| LOC_Os10g04260 | PA <sub>d</sub> | 10 | unknown | multigene | non-cluster |
| LOC_Os10g40980 | PA <sub>d</sub> | 10 | unknown | multigene | non-cluster |
| LOC_Os10g04080 | PA <sub>d</sub> | 10 | unknown | multigene | non-cluster |
| LOC_Os10g06810 | PA <sub>d</sub> | 10 | unknown | multigene | non-cluster |
| LOC_Os10g29060 | PA <sub>d</sub> | 10 | unknown | multigene | non-cluster |
| LOC_Os10g04800 | PA <sub>d</sub> | 10 | unknown | multigene | non-cluster |
| LOC_Os10g01830 | PA <sub>d</sub> | 10 | unknown | multigene | non-cluster |
| LOC_Os10g01400 | PA <sub>d</sub> | 10 | unknown | multigene | non-cluster |
| LOC_Os10g05920 | PA <sub>d</sub> | 10 | unknown | multigene | non-cluster |
| LOC_Os10g19820 | PA <sub>d</sub> | 10 | unknown | multigene | non-cluster |
| LOC_Os10g30230 | PA <sub>d</sub> | 10 | unknown | multigene | non-cluster |
| LOC_Os10g18850 | PA <sub>d</sub> | 10 | unknown | multigene | non-cluster |
| LOC_Os10g09890 | PA <sub>d</sub> | 10 | unknown | multigene | non-cluster |
| LOC_Os10g12180 | PA <sub>d</sub> | 10 | unknown | multigene | non-cluster |
| LOC_Os10g42030 | PA <sub>d</sub> | 10 | C&F     | multigene | non-cluster |
| LOC_Os10g06860 | PA <sub>d</sub> | 10 | C&F&P   | multigene | non-cluster |
| LOC_Os10g03210 | PA <sub>d</sub> | 10 | C&F&P   | multigene | non-cluster |
| LOC_Os10g04280 | PA <sub>d</sub> | 10 | C&F&P   | multigene | non-cluster |
| LOC_Os10g07120 | PA <sub>d</sub> | 10 | C&F&P   | multigene | non-cluster |
| LOC_Os10g12750 | PA <sub>d</sub> | 10 | C&F&P   | multigene | non-cluster |
| LOC_Os10g10790 | PA <sub>d</sub> | 10 | C&F&P   | multigene | non-cluster |
| LOC_Os10g12090 | PA <sub>d</sub> | 10 | C&F&P   | multigene | non-cluster |
| LOC_Os10g21570 | PA <sub>d</sub> | 10 | C&F&P   | multigene | non-cluster |
| LOC_Os10g37080 | PA <sub>d</sub> | 10 | C&F&P   | multigene | non-cluster |
| LOC_Os10g21500 | PA <sub>d</sub> | 10 | C&F&P   | multigene | non-cluster |
| LOC_Os10g26850 | PA <sub>d</sub> | 10 | C&F&P   | multigene | non-cluster |
| LOC_Os10g24960 | PA <sub>d</sub> | 10 | C&F&P   | multigene | non-cluster |
| LOC_Os10g20820 | PA <sub>d</sub> | 10 | C&P     | multigene | non-cluster |
| LOC_Os10g26430 | PA <sub>d</sub> | 10 | F       | multigene | non-cluster |
| LOC_Os10g08970 | PA <sub>d</sub> | 10 | F       | multigene | non-cluster |
| LOC_Os10g34860 | PA <sub>d</sub> | 10 | F       | multigene | non-cluster |
| LOC_Os10g30680 | PA <sub>d</sub> | 10 | F       | multigene | non-cluster |
| LOC_Os10g12140 | PA <sub>d</sub> | 10 | F       | multigene | non-cluster |
| LOC_Os10g03360 | PA <sub>d</sub> | 10 | F&P     | multigene | cluster     |
| LOC_Os10g11620 | PA <sub>d</sub> | 10 | F&P     | multigene | non-cluster |
| LOC_Os10g10730 | PA <sub>d</sub> | 10 | F&P     | multigene | non-cluster |
| LOC_Os10g03400 | PA <sub>d</sub> | 10 | F&P     | multigene | non-cluster |
| LOC_Os10g29280 | PA <sub>d</sub> | 10 | F&P     | multigene | non-cluster |
| LOC_Os10g11200 | PA <sub>d</sub> | 10 | F&P     | multigene | non-cluster |

|                                        |                 |    |         |           |             |
|----------------------------------------|-----------------|----|---------|-----------|-------------|
| LOC_Os10g12170                         | PA <sub>d</sub> | 10 | P       | multigene | non-cluster |
| <b>Genes on chromosome 10 of 93-11</b> |                 |    |         |           |             |
| OsIFCC031095                           | PA              | 10 | unknown | single    | non-cluster |
| OsIFCC031622                           | PA              | 10 | unknown | multigene | cluster     |
| OsIFCC029730                           | PA              | 10 | unknown | single    | non-cluster |
| OsIFCC029978                           | PA              | 10 | unknown | single    | non-cluster |
| OsIFCC030641                           | PA              | 10 | unknown | multigene | cluster     |
| OsIFCC031584                           | PA              | 10 | unknown | single    | non-cluster |
| OsIFCC030785                           | PA              | 10 | unknown | multigene | non-cluster |
| OsIFCC030194                           | PA              | 10 | C       | single    | non-cluster |
| OsIFCC029714                           | PA              | 10 | C       | single    | non-cluster |
| OsIFCC030962                           | PA              | 10 | C       | single    | non-cluster |
| OsIFCC031373                           | PA              | 10 | C       | single    | non-cluster |
| OsIFCC044308                           | PA              | 10 | C       | single    | non-cluster |
| OsIFCC029782                           | PA              | 10 | C&F     | multigene | non-cluster |
| OsIFCC029896                           | PA              | 10 | C&P     | single    | non-cluster |
| OsIFCC030659                           | PA              | 10 | C&P     | single    | non-cluster |
| OsIFCC029756                           | PA              | 10 | C&P     | single    | non-cluster |
| OsIFCC044130                           | PA              | 10 | F&P     | multigene | non-cluster |
| OsIFCC029754                           | PA              | 10 | F&P     | single    | non-cluster |
| OsIFCC030510                           | PA              | 10 | F&P     | single    | non-cluster |
| OsIFCC029923                           | PA              | 10 | unknown | multigene | non-cluster |
| OsIFCC030638                           | PA              | 10 | unknown | multigene | cluster     |
| OsIFCC030642                           | PA              | 10 | unknown | multigene | cluster     |
| OsIFCC029755                           | PA              | 10 | unknown | multigene | non-cluster |
| OsIFCC030000                           | PA              | 10 | unknown | single    | non-cluster |
| OsIFCC030591                           | PA              | 10 | unknown | single    | non-cluster |
| OsIFCC030607                           | PA              | 10 | unknown | multigene | non-cluster |
| OsIFCC030710                           | PA              | 10 | unknown | single    | non-cluster |
| OsIFCC030779                           | PA              | 10 | unknown | single    | non-cluster |
| OsIFCC030795                           | PA              | 10 | unknown | single    | non-cluster |
| OsIFCC031123                           | PA              | 10 | unknown | single    | non-cluster |
| OsIFCC031125                           | PA              | 10 | unknown | single    | non-cluster |
| OsIFCC031364                           | PA              | 10 | unknown | single    | non-cluster |
| OsIFCC044077                           | PA              | 10 | unknown | single    | non-cluster |
| OsIFCC044164                           | PA              | 10 | unknown | single    | non-cluster |
| OsIFCC044239                           | PA              | 10 | unknown | single    | non-cluster |
| OsIFCC031019                           | PA              | 10 | C       | single    | non-cluster |
| OsIFCC044348                           | PA              | 10 | C       | single    | non-cluster |
| OsIFCC029924                           | PA              | 10 | C&F     | multigene | non-cluster |
| OsIFCC031268                           | PA              | 10 | C&F&P   | single    | non-cluster |
| OsIFCC030146                           | PA              | 10 | C&F&P   | multigene | non-cluster |
| OsIFCC044368                           | PA              | 10 | C&F&P   | single    | non-cluster |
| OsIFCC029757                           | PA              | 10 | C&F&P   | single    | non-cluster |

|              |    |    |         |           |             |
|--------------|----|----|---------|-----------|-------------|
| OsIFCC029930 | PA | 10 | C&F&P   | single    | non-cluster |
| OsIFCC030072 | PA | 10 | C&F&P   | single    | non-cluster |
| OsIFCC030377 | PA | 10 | C&F&P   | single    | non-cluster |
| OsIFCC030737 | PA | 10 | C&F&P   | single    | non-cluster |
| OsIFCC030784 | PA | 10 | C&F&P   | single    | non-cluster |
| OsIFCC030835 | PA | 10 | C&F&P   | single    | non-cluster |
| OsIFCC031124 | PA | 10 | C&F&P   | single    | non-cluster |
| OsIFCC044059 | PA | 10 | C&F&P   | single    | non-cluster |
| OsIFCC044177 | PA | 10 | C&F&P   | single    | non-cluster |
| OsIFCC044319 | PA | 10 | C&F&P   | single    | non-cluster |
| OsIFCC030868 | PA | 10 | C&P     | single    | non-cluster |
| OsIFCC044520 | PA | 10 | C&P     | single    | non-cluster |
| OsIFCC031376 | PA | 10 | C&P     | multigene | cluster     |
| OsIFCC030281 | PA | 10 | F       | single    | non-cluster |
| OsIFCC031474 | PA | 10 | F&P     | single    | non-cluster |
| OsIFCC029781 | PA | 10 | F&P     | single    | non-cluster |
| OsIFCC029693 | PA | 10 | F&P     | single    | non-cluster |
| OsIFCC029753 | PA | 10 | F&P     | single    | non-cluster |
| OsIFCC030067 | PA | 10 | F&P     | single    | non-cluster |
| OsIFCC030069 | PA | 10 | F&P     | single    | non-cluster |
| OsIFCC030388 | PA | 10 | F&P     | single    | non-cluster |
| OsIFCC030637 | PA | 10 | F&P     | single    | non-cluster |
| OsIFCC031090 | PA | 10 | F&P     | single    | non-cluster |
| OsIFCC031091 | PA | 10 | F&P     | single    | non-cluster |
| OsIFCC031627 | PA | 10 | F&P     | multigene | non-cluster |
| OsIFCC029922 | PA | 10 | F&P     | multigene | non-cluster |
| OsIFCC031201 | AL | 10 | unknown | multigene | non-cluster |
| OsIFCC031623 | AL | 10 | unknown | single    | non-cluster |
| OsIFCC029919 | AL | 10 | C       | single    | non-cluster |
| OsIFCC031422 | AL | 10 | C       | multigene | cluster     |
| OsIFCC044584 | AL | 10 | C       | multigene | non-cluster |
| OsIFCC029729 | AL | 10 | C       | single    | non-cluster |
| OsIFCC029928 | AL | 10 | C       | multigene | non-cluster |
| OsIFCC030598 | AL | 10 | C       | single    | non-cluster |
| OsIFCC030707 | AL | 10 | C       | single    | non-cluster |
| OsIFCC044250 | AL | 10 | C       | multigene | non-cluster |
| OsIFCC044329 | AL | 10 | C       | single    | non-cluster |
| OsIFCC031586 | AL | 10 | C&F&P   | single    | non-cluster |
| OsIFCC030708 | AL | 10 | C&P     | multigene | non-cluster |
| OsIFCC044392 | AL | 10 | C&P     | multigene | non-cluster |
| OsIFCC030433 | AL | 10 | F&P     | single    | non-cluster |
| OsIFCC031017 | AL | 10 | unknown | single    | non-cluster |
| OsIFCC029713 | AL | 10 | unknown | single    | non-cluster |
| OsIFCC030108 | AL | 10 | unknown | single    | non-cluster |

|              |                 |    |         |           |             |
|--------------|-----------------|----|---------|-----------|-------------|
| OsIFCC030869 | AL              | 10 | unknown | single    | non-cluster |
| OsIFCC031348 | AL              | 10 | unknown | single    | non-cluster |
| OsIFCC031571 | AL              | 10 | unknown | single    | non-cluster |
| OsIFCC044274 | AL              | 10 | unknown | single    | non-cluster |
| OsIFCC044284 | AL              | 10 | unknown | single    | non-cluster |
| OsIFCC044375 | AL              | 10 | C       | multigene | non-cluster |
| OsIFCC044247 | AL              | 10 | C       | single    | non-cluster |
| OsIFCC044288 | AL              | 10 | C       | single    | non-cluster |
| OsIFCC044074 | AL              | 10 | C       | multigene | non-cluster |
| OsIFCC044327 | AL              | 10 | C       | single    | non-cluster |
| OsIFCC030883 | AL              | 10 | C&F     | single    | non-cluster |
| OsIFCC030758 | AL              | 10 | C&F&P   | multigene | non-cluster |
| OsIFCC029887 | AL              | 10 | C&F&P   | single    | non-cluster |
| OsIFCC029888 | AL              | 10 | C&F&P   | single    | non-cluster |
| OsIFCC029889 | AL              | 10 | C&F&P   | single    | non-cluster |
| OsIFCC029890 | AL              | 10 | C&F&P   | single    | non-cluster |
| OsIFCC029892 | AL              | 10 | C&F&P   | single    | non-cluster |
| OsIFCC029929 | AL              | 10 | C&F&P   | single    | non-cluster |
| OsIFCC030101 | AL              | 10 | C&F&P   | single    | non-cluster |
| OsIFCC044326 | AL              | 10 | C&F&P   | single    | non-cluster |
| OsIFCC044401 | AL              | 10 | C&F&P   | single    | non-cluster |
| OsIFCC044583 | AL              | 10 | C&F&P   | single    | non-cluster |
| OsIFCC030870 | AL              | 10 | C&P     | single    | non-cluster |
| OsIFCC029796 | AL              | 10 | F       | multigene | non-cluster |
| OsIFCC029790 | AL              | 10 | F       | single    | non-cluster |
| OsIFCC030432 | AL              | 10 | F&P     | single    | non-cluster |
| OsIFCC031632 | AL              | 10 | F&P     | single    | non-cluster |
| OsIFCC030100 | AL              | 10 | P       | single    | non-cluster |
| OsIFCC029850 | PA <sub>d</sub> | 10 | F&P     | multigene | non-cluster |
| OsIFCC029947 | PA <sub>d</sub> | 10 | unknown | multigene | non-cluster |
| OsIFCC030031 | PA <sub>d</sub> | 10 | F&P     | multigene | non-cluster |
| OsIFCC030060 | PA <sub>d</sub> | 10 | C&P     | multigene | non-cluster |
| OsIFCC030107 | PA <sub>d</sub> | 10 | C       | multigene | non-cluster |
| OsIFCC030276 | PA <sub>d</sub> | 10 | F&P     | multigene | non-cluster |
| OsIFCC030280 | PA <sub>d</sub> | 10 | C&F&P   | multigene | non-cluster |
| OsIFCC030362 | PA <sub>d</sub> | 10 | unknown | multigene | non-cluster |
| OsIFCC030709 | PA <sub>d</sub> | 10 | unknown | multigene | non-cluster |
| OsIFCC030772 | PA <sub>d</sub> | 10 | unknown | multigene | non-cluster |
| OsIFCC030796 | PA <sub>d</sub> | 10 | C       | multigene | non-cluster |
| OsIFCC031282 | PA <sub>d</sub> | 10 | C       | multigene | non-cluster |
| OsIFCC031283 | PA <sub>d</sub> | 10 | F&P     | multigene | non-cluster |
| OsIFCC031347 | PA <sub>d</sub> | 10 | C       | multigene | non-cluster |
| OsIFCC031371 | PA <sub>d</sub> | 10 | F       | multigene | non-cluster |
| OsIFCC031415 | PA <sub>d</sub> | 10 | C       | multigene | non-cluster |

|              |                 |    |         |           |             |
|--------------|-----------------|----|---------|-----------|-------------|
| OsIFCC031505 | PA <sub>d</sub> | 10 | C&F     | multigene | non-cluster |
| OsIFCC031644 | PA <sub>d</sub> | 10 | C&F&P   | multigene | non-cluster |
| OsIFCC031804 | PA <sub>d</sub> | 10 | F&P     | multigene | non-cluster |
| OsIFCC044069 | PA <sub>d</sub> | 10 | C       | multigene | non-cluster |
| OsIFCC029792 | PA <sub>d</sub> | 10 | unknown | multigene | non-cluster |
| OsIFCC029793 | PA <sub>d</sub> | 10 | unknown | multigene | non-cluster |
| OsIFCC030145 | PA <sub>d</sub> | 10 | unknown | multigene | non-cluster |
| OsIFCC030445 | PA <sub>d</sub> | 10 | unknown | multigene | non-cluster |
| OsIFCC030451 | PA <sub>d</sub> | 10 | unknown | multigene | non-cluster |
| OsIFCC030536 | PA <sub>d</sub> | 10 | unknown | multigene | non-cluster |
| OsIFCC030650 | PA <sub>d</sub> | 10 | unknown | multigene | non-cluster |
| OsIFCC030771 | PA <sub>d</sub> | 10 | unknown | multigene | non-cluster |
| OsIFCC030812 | PA <sub>d</sub> | 10 | unknown | multigene | non-cluster |
| OsIFCC031033 | PA <sub>d</sub> | 10 | unknown | multigene | non-cluster |
| OsIFCC031258 | PA <sub>d</sub> | 10 | unknown | multigene | non-cluster |
| OsIFCC031295 | PA <sub>d</sub> | 10 | unknown | multigene | non-cluster |
| OsIFCC031488 | PA <sub>d</sub> | 10 | unknown | multigene | non-cluster |
| OsIFCC031491 | PA <sub>d</sub> | 10 | unknown | multigene | non-cluster |
| OsIFCC044058 | PA <sub>d</sub> | 10 | unknown | multigene | non-cluster |
| OsIFCC044141 | PA <sub>d</sub> | 10 | unknown | multigene | non-cluster |
| OsIFCC044334 | PA <sub>d</sub> | 10 | unknown | multigene | non-cluster |
| OsIFCC029777 | PA <sub>d</sub> | 10 | unknown | multigene | non-cluster |
| OsIFCC030068 | PA <sub>d</sub> | 10 | unknown | multigene | non-cluster |
| OsIFCC030193 | PA <sub>d</sub> | 10 | C       | multigene | non-cluster |
| OsIFCC029789 | PA <sub>d</sub> | 10 | C&F     | multigene | non-cluster |
| OsIFCC030262 | PA <sub>d</sub> | 10 | C&F&P   | multigene | non-cluster |
| OsIFCC030293 | PA <sub>d</sub> | 10 | C&F&P   | multigene | non-cluster |
| OsIFCC030456 | PA <sub>d</sub> | 10 | C&F&P   | multigene | non-cluster |
| OsIFCC030618 | PA <sub>d</sub> | 10 | C&F&P   | multigene | non-cluster |
| OsIFCC030651 | PA <sub>d</sub> | 10 | C&F&P   | multigene | non-cluster |
| OsIFCC031475 | PA <sub>d</sub> | 10 | C&F&P   | multigene | non-cluster |
| OsIFCC044068 | PA <sub>d</sub> | 10 | C&F&P   | multigene | non-cluster |
| OsIFCC044414 | PA <sub>d</sub> | 10 | C&F&P   | multigene | non-cluster |
| OsIFCC044512 | PA <sub>d</sub> | 10 | C&F&P   | multigene | non-cluster |
| OsIFCC031370 | PA <sub>d</sub> | 10 | C&F&P   | multigene | cluster     |
| OsIFCC031372 | PA <sub>d</sub> | 10 | C&F&P   | multigene | cluster     |
| OsIFCC029732 | PA <sub>d</sub> | 10 | C&F&P   | multigene | non-cluster |
| OsIFCC031221 | PA <sub>d</sub> | 10 | C&F&P   | multigene | non-cluster |
| OsIFCC030292 | PA <sub>d</sub> | 10 | C&P     | multigene | non-cluster |
| OsIFCC030294 | PA <sub>d</sub> | 10 | C&P     | multigene | non-cluster |
| OsIFCC030872 | PA <sub>d</sub> | 10 | C&P     | multigene | non-cluster |
| OsIFCC044367 | PA <sub>d</sub> | 10 | C&P     | multigene | non-cluster |
| OsIFCC044378 | PA <sub>d</sub> | 10 | C&P     | multigene | non-cluster |
| OsIFCC044253 | PA <sub>d</sub> | 10 | C&P     | multigene | non-cluster |



|                                                          |                 |    |                 |           |             |
|----------------------------------------------------------|-----------------|----|-----------------|-----------|-------------|
| OsIFCC030711                                             | PA <sub>d</sub> | 10 | F               | multigene | non-cluster |
| OsIFCC029798                                             | PA <sub>d</sub> | 10 | F               | multigene | non-cluster |
| OsIFCC029719                                             | PA <sub>d</sub> | 10 | F&P             | multigene | non-cluster |
| OsIFCC030066                                             | PA <sub>d</sub> | 10 | F&P             | multigene | non-cluster |
| OsIFCC030430                                             | PA <sub>d</sub> | 10 | F&P             | multigene | non-cluster |
| OsIFCC030640                                             | PA <sub>d</sub> | 10 | F&P             | multigene | non-cluster |
| OsIFCC030989                                             | PA <sub>d</sub> | 10 | F&P             | multigene | non-cluster |
| OsIFCC031570                                             | PA <sub>d</sub> | 10 | F&P             | multigene | non-cluster |
| OsIFCC044369                                             | PA <sub>d</sub> | 10 | F&P             | multigene | non-cluster |
| OsIFCC030144                                             | PA <sub>d</sub> | 10 | P               | multigene | non-cluster |
| OsIFCC030535                                             | PA <sub>d</sub> | 10 | P               | multigene | non-cluster |
| OsIFCC044112                                             | PA <sub>d</sub> | 10 | P               | multigene | non-cluster |
| <b>Genes in inserts of aligned contigs in Nipponbare</b> |                 |    |                 |           |             |
| LOC_Os01g05930                                           | PA              | 1  | C&F&P           | single    | non-cluster |
| LOC_Os01g38360                                           | PA              | 1  | C&F&P           | single    | non-cluster |
| LOC_Os01g51370                                           | PA              | 1  | unknown         | single    | non-cluster |
| LOC_Os02g44090                                           | PA              | 2  | C               | single    | non-cluster |
| LOC_Os03g45280                                           | PA              | 3  | unknown         | single    | non-cluster |
| LOC_Os04g31090                                           | PA              | 4  | C&F&P           | single    | non-cluster |
| LOC_Os05g36980                                           | PA              | 5  | F&P             | single    | non-cluster |
| LOC_Os05g49330                                           | PA              | 5  | C&F&P           | single    | non-cluster |
| LOC_Os06g13950                                           | PA              | 6  | ND <sup>c</sup> | single    | non-cluster |
| LOC_Os06g16790                                           | PA              | 6  | F&P             | single    | non-cluster |
| LOC_Os07g18930                                           | PA              | 7  | unknown         | single    | non-cluster |
| LOC_Os07g36050                                           | PA              | 7  | ND              | multigene | cluster     |
| LOC_Os07g41850                                           | PA              | 7  | P               | single    | non-cluster |
| LOC_Os07g41860                                           | PA              | 7  | C&F&P           | single    | non-cluster |
| LOC_Os08g30840                                           | PA              | 8  | C               | single    | non-cluster |
| LOC_Os10g36300                                           | PA              | 10 | unknown         | single    | non-cluster |
| LOC_Os10g36330                                           | PA              | 10 | C               | single    | non-cluster |
| LOC_Os11g13900                                           | PA              | 11 | unknown         | multigene | non-cluster |
| LOC_Os11g13910                                           | PA              | 11 | C               | multigene | non-cluster |
| LOC_Os12g34470                                           | PA              | 12 | P               | single    | non-cluster |
| LOC_Os01g04430                                           | AL              | 1  | F&P             | multigene | cluster     |
| LOC_Os01g05920                                           | AL              | 1  | unknown         | multigene | non-cluster |
| LOC_Os01g06950                                           | AL              | 1  | P               | multigene | cluster     |
| LOC_Os01g10170                                           | AL              | 1  | C&F             | multigene | non-cluster |
| LOC_Os01g10650                                           | AL              | 1  | ND <sup>c</sup> | multigene | non-cluster |
| LOC_Os01g12370                                           | AL              | 1  | C&F&P           | multigene | non-cluster |
| LOC_Os01g35960                                           | AL              | 1  | unknown         | multigene | non-cluster |
| LOC_Os01g43020                                           | AL              | 1  | C&F&P           | single    | non-cluster |
| LOC_Os01g67630                                           | AL              | 1  | C&F&P           | multigene | cluster     |
| LOC_Os02g34360                                           | AL              | 2  | unknown         | multigene | cluster     |
| LOC_Os03g18970                                           | AL              | 3  | unknown         | multigene | non-cluster |

|                |    |    |         |           |             |
|----------------|----|----|---------|-----------|-------------|
| LOC_Os03g19770 | AL | 3  | C&F&P   | multigene | non-cluster |
| LOC_Os03g47500 | AL | 3  | P       | multigene | non-cluster |
| LOC_Os04g04050 | AL | 4  | P       | multigene | cluster     |
| LOC_Os04g04060 | AL | 4  | C&F&P   | multigene | non-cluster |
| LOC_Os04g25520 | AL | 4  | unknown | multigene | non-cluster |
| LOC_Os04g25530 | AL | 4  | unknown | multigene | non-cluster |
| LOC_Os04g38270 | AL | 4  | unknown | single    | non-cluster |
| LOC_Os04g53470 | AL | 4  | C&F&P   | multigene | cluster     |
| LOC_Os04g53830 | AL | 4  | C&F&P   | multigene | cluster     |
| LOC_Os04g53850 | AL | 4  | unknown | multigene | cluster     |
| LOC_Os05g06300 | AL | 5  | F&P     | multigene | non-cluster |
| LOC_Os05g19910 | AL | 5  | unknown | single    | non-cluster |
| LOC_Os05g19920 | AL | 5  | unknown | single    | non-cluster |
| LOC_Os05g28150 | AL | 5  | F&P     | multigene | non-cluster |
| LOC_Os06g07180 | AL | 6  | P       | single    | non-cluster |
| LOC_Os06g07190 | AL | 6  | unknown | multigene | non-cluster |
| LOC_Os06g07200 | AL | 6  | P       | single    | non-cluster |
| LOC_Os06g07210 | AL | 6  | F&P     | multigene | non-cluster |
| LOC_Os06g09140 | AL | 6  | F&P     | multigene | non-cluster |
| LOC_Os06g16780 | AL | 6  | unknown | multigene | non-cluster |
| LOC_Os06g21840 | AL | 6  | C&F&P   | multigene | non-cluster |
| LOC_Os06g24860 | AL | 6  | unknown | multigene | non-cluster |
| LOC_Os06g39080 | AL | 6  | C&F&P   | multigene | cluster     |
| LOC_Os07g07400 | AL | 7  | C&F&P   | multigene | cluster     |
| LOC_Os07g07410 | AL | 7  | F&P     | single    | non-cluster |
| LOC_Os07g07420 | AL | 7  | F&P     | single    | non-cluster |
| LOC_Os07g18940 | AL | 7  | unknown | multigene | non-cluster |
| LOC_Os07g25770 | AL | 7  | C&F&P   | multigene | non-cluster |
| LOC_Os07g45960 | AL | 7  | F       | multigene | non-cluster |
| LOC_Os07g49140 | AL | 7  | C&F&P   | single    | non-cluster |
| LOC_Os07g49150 | AL | 7  | C&F&P   | multigene | non-cluster |
| LOC_Os08g30460 | AL | 8  | F&P     | multigene | non-cluster |
| LOC_Os08g41450 | AL | 8  | unknown | multigene | non-cluster |
| LOC_Os08g44040 | AL | 8  | C&F&P   | multigene | cluster     |
| LOC_Os09g12150 | AL | 9  | unknown | multigene | non-cluster |
| LOC_Os09g23180 | AL | 9  | C&F&P   | multigene | non-cluster |
| LOC_Os10g11100 | AL | 10 | C       | multigene | non-cluster |
| LOC_Os10g23250 | AL | 10 | unknown | multigene | non-cluster |
| LOC_Os10g24930 | AL | 10 | C       | multigene | non-cluster |
| LOC_Os10g35900 | AL | 10 | unknown | multigene | non-cluster |
| LOC_Os10g36320 | AL | 10 | F       | multigene | non-cluster |
| LOC_Os11g34270 | AL | 11 | C&F&P   | single    | non-cluster |
| LOC_Os12g07970 | AL | 12 | C&P     | multigene | non-cluster |
| LOC_Os12g15230 | AL | 12 | C&P     | multigene | non-cluster |

|                |                 |    |         |           |             |
|----------------|-----------------|----|---------|-----------|-------------|
| LOC_Os12g27210 | AL              | 12 | C&F&P   | multigene | non-cluster |
| LOC_Os01g03470 | PA <sub>d</sub> | 1  | P       | multigene | non-cluster |
| LOC_Os01g08050 | PA <sub>d</sub> | 1  | P       | multigene | non-cluster |
| LOC_Os01g22570 | PA <sub>d</sub> | 1  | P       | multigene | non-cluster |
| LOC_Os01g43010 | PA <sub>d</sub> | 1  | P       | multigene | non-cluster |
| LOC_Os01g54310 | PA <sub>d</sub> | 1  | C&F     | multigene | non-cluster |
| LOC_Os01g64220 | PA <sub>d</sub> | 1  | F       | multigene | non-cluster |
| LOC_Os02g13390 | PA <sub>d</sub> | 2  | ND      | multigene | non-cluster |
| LOC_Os02g36820 | PA <sub>d</sub> | 2  | P       | multigene | non-cluster |
| LOC_Os02g37310 | PA <sub>d</sub> | 2  | F       | multigene | cluster     |
| LOC_Os03g03490 | PA <sub>d</sub> | 3  | C&F&P   | multigene | non-cluster |
| LOC_Os03g24770 | PA <sub>d</sub> | 3  | P       | multigene | non-cluster |
| LOC_Os03g24810 | PA <sub>d</sub> | 3  | C&F     | multigene | non-cluster |
| LOC_Os04g09730 | PA <sub>d</sub> | 4  | unknown | multigene | non-cluster |
| LOC_Os04g31100 | PA <sub>d</sub> | 4  | F       | multigene | non-cluster |
| LOC_Os04g38280 | PA <sub>d</sub> | 4  | C&P     | multigene | non-cluster |
| LOC_Os04g38290 | PA <sub>d</sub> | 4  | F       | multigene | cluster     |
| LOC_Os04g49280 | PA <sub>d</sub> | 4  | C&F&P   | multigene | non-cluster |
| LOC_Os04g50050 | PA <sub>d</sub> | 4  | C&F&P   | multigene | non-cluster |
| LOC_Os04g50840 | PA <sub>d</sub> | 4  | P       | multigene | non-cluster |
| LOC_Os04g53840 | PA <sub>d</sub> | 4  | C       | multigene | non-cluster |
| LOC_Os05g43330 | PA <sub>d</sub> | 5  | C&F&P   | multigene | non-cluster |
| LOC_Os05g50530 | PA <sub>d</sub> | 5  | C&F&P   | multigene | non-cluster |
| LOC_Os06g03100 | PA <sub>d</sub> | 6  | F       | multigene | non-cluster |
| LOC_Os06g15240 | PA <sub>d</sub> | 6  | F       | multigene | non-cluster |
| LOC_Os06g16770 | PA <sub>d</sub> | 6  | F&P     | multigene | non-cluster |
| LOC_Os06g49360 | PA <sub>d</sub> | 6  | F&P     | multigene | cluster     |
| LOC_Os06g49380 | PA <sub>d</sub> | 6  | F&P     | multigene | non-cluster |
| LOC_Os06g49410 | PA <sub>d</sub> | 6  | P       | multigene | non-cluster |
| LOC_Os07g10180 | PA <sub>d</sub> | 7  | unknown | multigene | non-cluster |
| LOC_Os07g11550 | PA <sub>d</sub> | 7  | unknown | multigene | non-cluster |
| LOC_Os07g18950 | PA <sub>d</sub> | 7  | unknown | multigene | non-cluster |
| LOC_Os07g31680 | PA <sub>d</sub> | 7  | F&P     | multigene | non-cluster |
| LOC_Os07g36060 | PA <sub>d</sub> | 7  | F&P     | multigene | cluster     |
| LOC_Os07g46470 | PA <sub>d</sub> | 7  | unknown | multigene | non-cluster |
| LOC_Os08g01540 | PA <sub>d</sub> | 8  | C&F&P   | multigene | non-cluster |
| LOC_Os08g10150 | PA <sub>d</sub> | 8  | P       | multigene | cluster     |
| LOC_Os08g30690 | PA <sub>d</sub> | 8  | unknown | multigene | non-cluster |
| LOC_Os09g03150 | PA <sub>d</sub> | 9  | unknown | multigene | non-cluster |
| LOC_Os09g07210 | PA <sub>d</sub> | 9  | unknown | multigene | non-cluster |
| LOC_Os09g21720 | PA <sub>d</sub> | 9  | F       | multigene | non-cluster |
| LOC_Os09g26010 | PA <sub>d</sub> | 9  | F       | multigene | non-cluster |
| LOC_Os09g39130 | PA <sub>d</sub> | 9  | C&F&P   | multigene | non-cluster |
| LOC_Os10g03890 | PA <sub>d</sub> | 10 | C       | multigene | non-cluster |

|                |                 |    |         |           |             |
|----------------|-----------------|----|---------|-----------|-------------|
| LOC_Os10g07060 | PA <sub>d</sub> | 10 | C       | multigene | non-cluster |
| LOC_Os10g24950 | PA <sub>d</sub> | 10 | C&P     | multigene | non-cluster |
| LOC_Os10g24960 | PA <sub>d</sub> | 10 | C&F&P   | multigene | non-cluster |
| LOC_Os10g30230 | PA <sub>d</sub> | 10 | unknown | multigene | non-cluster |
| LOC_Os10g39700 | PA <sub>d</sub> | 10 | P       | multigene | non-cluster |
| LOC_Os11g07640 | PA <sub>d</sub> | 11 | unknown | multigene | cluster     |
| LOC_Os11g29600 | PA <sub>d</sub> | 11 | unknown | multigene | non-cluster |
| LOC_Os11g40010 | PA <sub>d</sub> | 11 | F       | multigene | cluster     |
| LOC_Os12g07920 | PA <sub>d</sub> | 12 | P       | multigene | non-cluster |
| LOC_Os12g12140 | PA <sub>d</sub> | 12 | P       | multigene | non-cluster |
| LOC_Os12g23150 | PA <sub>d</sub> | 12 | unknown | multigene | non-cluster |
| LOC_Os12g36710 | PA <sub>d</sub> | 12 | F&P     | multigene | cluster     |
| LOC_Os12g39770 | PA <sub>d</sub> | 12 | C&F&P   | multigene | non-cluster |

**Genes in inserts of aligned contigs in 93-11**

|              |    |   |         |        |             |
|--------------|----|---|---------|--------|-------------|
| OsIFCC000246 | PA | 1 | F       | single | non-cluster |
| OsIFCC000370 | PA | 1 | C&F&P   | single | non-cluster |
| OsIFCC000410 | PA | 1 | unknown | single | non-cluster |
| OsIFCC001724 | PA | 1 | F       | single | non-cluster |
| OsIFCC006841 | PA | 3 | C&F&P   | single | non-cluster |
| OsIFCC006842 | PA | 3 | unknown | single | non-cluster |
| OsIFCC008120 | PA | 2 | C&F&P   | single | non-cluster |
| OsIFCC009848 | PA | 6 | unknown | single | non-cluster |
| OsIFCC010119 | PA | 6 | F       | single | non-cluster |
| OsIFCC011269 | PA | 6 | unknown | single | non-cluster |
| OsIFCC011559 | PA | 6 | C&F&P   | single | non-cluster |
| OsIFCC011886 | PA | 6 | F&P     | single | non-cluster |
| OsIFCC011887 | PA | 6 | F&P     | single | non-cluster |
| OsIFCC012429 | PA | 2 | unknown | single | non-cluster |
| OsIFCC013587 | PA | 2 | F&P     | single | non-cluster |
| OsIFCC013776 | PA | 2 | C       | single | non-cluster |
| OsIFCC014669 | PA | 2 | F&P     | single | non-cluster |
| OsIFCC015220 | PA | 2 | C&F&P   | single | non-cluster |
| OsIFCC016295 | PA | 4 | C&F&P   | single | non-cluster |
| OsIFCC016296 | PA | 4 | C&F&P   | single | non-cluster |
| OsIFCC016641 | PA | 4 | unknown | single | non-cluster |
| OsIFCC017095 | PA | 4 | F&P     | single | non-cluster |
| OsIFCC018309 | PA | 4 | unknown | single | non-cluster |
| OsIFCC019342 | PA | 4 | F&P     | single | non-cluster |
| OsIFCC019343 | PA | 4 | F&P     | single | non-cluster |
| OsIFCC019344 | PA | 4 | C&F&P   | single | non-cluster |
| OsIFCC019676 | PA | 5 | F       | single | non-cluster |
| OsIFCC022576 | PA | 7 | unknown | single | non-cluster |
| OsIFCC023379 | PA | 7 | C&F&P   | single | non-cluster |
| OsIFCC023896 | PA | 7 | unknown | single | non-cluster |

|              |    |                 |         |           |             |
|--------------|----|-----------------|---------|-----------|-------------|
| OsIFCC024318 | PA | 7               | C&F&P   | single    | non-cluster |
| OsIFCC024319 | PA | 7               | C&F&P   | single    | non-cluster |
| OsIFCC025461 | PA | 8               | C&F&P   | single    | non-cluster |
| OsIFCC026131 | PA | 8               | unknown | single    | non-cluster |
| OsIFCC027915 | PA | 3               | C&F&P   | single    | non-cluster |
| OsIFCC028092 | PA | 9               | unknown | single    | non-cluster |
| OsIFCC029245 | PA | 9               | C&F&P   | single    | non-cluster |
| OsIFCC030146 | PA | 10              | C&F&P   | multigene | non-cluster |
| OsIFCC031268 | PA | 10              | C&F&P   | single    | non-cluster |
| OsIFCC031269 | PA | 10              | F       | single    | non-cluster |
| OsIFCC032306 | PA | 12              | F&P     | single    | non-cluster |
| OsIFCC032860 | PA | 12              | unknown | single    | non-cluster |
| OsIFCC033150 | PA | 12              | F&P     | single    | non-cluster |
| OsIFCC034369 | PA | 11              | P       | single    | non-cluster |
| OsIFCC034431 | PA | 11              | C&P     | single    | non-cluster |
| OsIFCC034506 | PA | 11              | unknown | single    | non-cluster |
| OsIFCC034565 | PA | 11              | C       | single    | non-cluster |
| OsIFCC036060 | PA | 11              | C       | single    | non-cluster |
| OsIFCC037848 | PA | 3               | C&F&P   | single    | non-cluster |
| OsIFCC038863 | PA | 6               | P       | single    | non-cluster |
| OsIFCC040675 | PA | 4               | P       | single    | non-cluster |
| OsIFCC041264 | PA | 5               | unknown | single    | non-cluster |
| OsIFCC042890 | PA | 8               | C&F&P   | single    | non-cluster |
| OsIFCC043050 | PA | 8               | C&P     | single    | non-cluster |
| OsIFCC043185 | PA | 8               | C&F&P   | single    | non-cluster |
| OsIFCC044928 | PA | 12              | unknown | single    | non-cluster |
| OsIFCC045383 | PA | 11              | C       | single    | non-cluster |
| OsIFSC046432 | PA | NF <sup>b</sup> | P       | single    | non-cluster |
| OsIFSC046483 | PA | NF              | F&P     | single    | non-cluster |
| OsIFSC046484 | PA | NF              | unknown | single    | non-cluster |
| OsIFSC046500 | PA | NF              | F       | single    | non-cluster |
| OsIFSC048165 | PA | NF              | unknown | single    | non-cluster |
| OsIFCC002147 | AL | 1               | P       | single    | non-cluster |
| OsIFCC002148 | AL | 1               | unknown | multigene | non-cluster |
| OsIFCC003001 | AL | 1               | P       | single    | non-cluster |
| OsIFCC003352 | AL | 1               | C&F     | single    | non-cluster |
| OsIFCC003829 | AL | 1               | F&P     | single    | non-cluster |
| OsIFCC003830 | AL | 1               | unknown | single    | non-cluster |
| OsIFCC004057 | AL | 1               | unknown | single    | non-cluster |
| OsIFCC005469 | AL | 3               | F       | multigene | non-cluster |
| OsIFCC005470 | AL | 3               | unknown | multigene | non-cluster |
| OsIFCC007038 | AL | 3               | C       | single    | non-cluster |
| OsIFCC007699 | AL | 3               | F&P     | single    | non-cluster |
| OsIFCC007700 | AL | 3               | P       | multigene | non-cluster |

|              |    |   |         |           |             |
|--------------|----|---|---------|-----------|-------------|
| OsIFCC007701 | AL | 3 | F       | multigene | non-cluster |
| OsIFCC008104 | AL | 3 | unknown | single    | non-cluster |
| OsIFCC008370 | AL | 3 | C&F&P   | single    | non-cluster |
| OsIFCC008371 | AL | 3 | F&P     | multigene | cluster     |
| OsIFCC008820 | AL | 3 | P       | single    | non-cluster |
| OsIFCC008821 | AL | 3 | C&F&P   | single    | non-cluster |
| OsIFCC008822 | AL | 3 | C&F&P   | multigene | non-cluster |
| OsIFCC008823 | AL | 3 | C&F&P   | single    | non-cluster |
| OsIFCC009799 | AL | 6 | F&P     | single    | non-cluster |
| OsIFCC010424 | AL | 6 | C&F&P   | single    | non-cluster |
| OsIFCC010875 | AL | 6 | unknown | single    | non-cluster |
| OsIFCC011402 | AL | 6 | P       | single    | non-cluster |
| OsIFCC011404 | AL | 6 | C&F&P   | single    | non-cluster |
| OsIFCC011405 | AL | 6 | C&F&P   | single    | non-cluster |
| OsIFCC012002 | AL | 6 | F&P     | single    | non-cluster |
| OsIFCC012003 | AL | 6 | F&P     | single    | non-cluster |
| OsIFCC012098 | AL | 6 | P       | single    | non-cluster |
| OsIFCC012911 | AL | 2 | F       | single    | non-cluster |
| OsIFCC013393 | AL | 2 | unknown | single    | non-cluster |
| OsIFCC016608 | AL | 4 | C       | multigene | non-cluster |
| OsIFCC016640 | AL | 4 | unknown | single    | non-cluster |
| OsIFCC016694 | AL | 4 | C&F&P   | single    | non-cluster |
| OsIFCC018307 | AL | 4 | P       | single    | non-cluster |
| OsIFCC018475 | AL | 4 | unknown | single    | non-cluster |
| OsIFCC018611 | AL | 4 | C&F&P   | multigene | non-cluster |
| OsIFCC018613 | AL | 4 | C&F&P   | multigene | non-cluster |
| OsIFCC018803 | AL | 4 | C       | multigene | cluster     |
| OsIFCC019374 | AL | 5 | unknown | single    | non-cluster |
| OsIFCC019844 | AL | 5 | C&F     | single    | non-cluster |
| OsIFCC020501 | AL | 5 | unknown | single    | non-cluster |
| OsIFCC020584 | AL | 5 | C&F&P   | single    | non-cluster |
| OsIFCC021616 | AL | 5 | C       | single    | non-cluster |
| OsIFCC022660 | AL | 7 | F&P     | single    | non-cluster |
| OsIFCC023297 | AL | 7 | unknown | single    | non-cluster |
| OsIFCC023478 | AL | 7 | C&F&P   | single    | non-cluster |
| OsIFCC023479 | AL | 7 | unknown | single    | non-cluster |
| OsIFCC023895 | AL | 7 | unknown | multigene | non-cluster |
| OsIFCC024353 | AL | 7 | C&F&P   | single    | non-cluster |
| OsIFCC024904 | AL | 7 | F       | single    | non-cluster |
| OsIFCC024905 | AL | 7 | F&P     | single    | non-cluster |
| OsIFCC025282 | AL | 8 | F       | multigene | cluster     |
| OsIFCC025283 | AL | 8 | C&F     | multigene | cluster     |
| OsIFCC026695 | AL | 8 | F&P     | single    | non-cluster |
| OsIFCC026756 | AL | 8 | F&P     | single    | non-cluster |

|              |    |    |         |           |             |
|--------------|----|----|---------|-----------|-------------|
| OsIFCC026783 | AL | 8  | F       | multigene | non-cluster |
| OsIFCC026784 | AL | 8  | unknown | multigene | cluster     |
| OsIFCC026811 | AL | 8  | unknown | single    | non-cluster |
| OsIFCC027367 | AL | 8  | C&F&P   | multigene | cluster     |
| OsIFCC027577 | AL | 8  | C&P     | single    | non-cluster |
| OsIFCC027578 | AL | 8  | F       | single    | non-cluster |
| OsIFCC027579 | AL | 8  | C&F&P   | single    | non-cluster |
| OsIFCC027580 | AL | 8  | C&P     | multigene | non-cluster |
| OsIFCC028035 | AL | 9  | unknown | multigene | non-cluster |
| OsIFCC028419 | AL | 9  | C&F&P   | single    | non-cluster |
| OsIFCC028481 | AL | 9  | C&F&P   | single    | non-cluster |
| OsIFCC029006 | AL | 9  | unknown | multigene | cluster     |
| OsIFCC029299 | AL | 9  | F&P     | single    | non-cluster |
| OsIFCC029576 | AL | 9  | C&F&P   | single    | non-cluster |
| OsIFCC030488 | AL | 10 | unknown | multigene | non-cluster |
| OsIFCC030708 | AL | 10 | C&P     | multigene | non-cluster |
| OsIFCC032513 | AL | 12 | C&F&P   | single    | non-cluster |
| OsIFCC032719 | AL | 12 | C&P     | multigene | non-cluster |
| OsIFCC033082 | AL | 12 | F&P     | single    | non-cluster |
| OsIFCC033083 | AL | 12 | F&P     | single    | non-cluster |
| OsIFCC033284 | AL | 12 | C&F     | multigene | non-cluster |
| OsIFCC033359 | AL | 12 | unknown | single    | non-cluster |
| OsIFCC033744 | AL | 12 | C&F     | single    | non-cluster |
| OsIFCC034370 | AL | 11 | F&P     | single    | non-cluster |
| OsIFCC034566 | AL | 11 | C&F&P   | multigene | non-cluster |
| OsIFCC034678 | AL | 11 | unknown | single    | non-cluster |
| OsIFCC036488 | AL | 1  | unknown | multigene | cluster     |
| OsIFCC036519 | AL | 1  | F&P     | multigene | non-cluster |
| OsIFCC038684 | AL | 6  | unknown | single    | non-cluster |
| OsIFCC039658 | AL | 2  | unknown | multigene | non-cluster |
| OsIFCC040126 | AL | 2  | C&F&P   | single    | non-cluster |
| OsIFCC040719 | AL | 4  | unknown | multigene | non-cluster |
| OsIFCC041294 | AL | 5  | P       | single    | non-cluster |
| OsIFCC041339 | AL | 5  | C&P     | multigene | non-cluster |
| OsIFCC042030 | AL | 7  | unknown | multigene | non-cluster |
| OsIFCC042031 | AL | 7  | unknown | single    | non-cluster |
| OsIFCC042808 | AL | 8  | F       | multigene | cluster     |
| OsIFCC042809 | AL | 8  | C&F&P   | single    | non-cluster |
| OsIFCC042888 | AL | 8  | C&F&P   | single    | non-cluster |
| OsIFCC043590 | AL | 9  | P       | multigene | non-cluster |
| OsIFCC044679 | AL | 12 | unknown | multigene | non-cluster |
| OsIFCC044984 | AL | 12 | C&F&P   | multigene | non-cluster |
| OsIFCC045106 | AL | 12 | F&P     | multigene | non-cluster |
| OsIFSC048166 | AL | NF | C&P     | single    | non-cluster |

|              |                 |    |         |           |             |
|--------------|-----------------|----|---------|-----------|-------------|
| OsIFCC001432 | PA <sub>d</sub> | 1  | P       | multigene | cluster     |
| OsIFCC006341 | PA <sub>d</sub> | 3  | F&P     | multigene | non-cluster |
| OsIFCC010118 | PA <sub>d</sub> | 6  | unknown | multigene | non-cluster |
| OsIFCC011403 | PA <sub>d</sub> | 6  | F&P     | multigene | non-cluster |
| OsIFCC012906 | PA <sub>d</sub> | 2  | F       | multigene | non-cluster |
| OsIFCC012910 | PA <sub>d</sub> | 2  | unknown | multigene | non-cluster |
| OsIFCC015356 | PA <sub>d</sub> | 2  | unknown | multigene | non-cluster |
| OsIFCC016225 | PA <sub>d</sub> | 4  | C       | multigene | non-cluster |
| OsIFCC016294 | PA <sub>d</sub> | 4  | unknown | multigene | non-cluster |
| OsIFCC017282 | PA <sub>d</sub> | 4  | F&P     | multigene | non-cluster |
| OsIFCC017650 | PA <sub>d</sub> | 4  | C&F&P   | multigene | non-cluster |
| OsIFCC018310 | PA <sub>d</sub> | 4  | unknown | multigene | cluster     |
| OsIFCC018311 | PA <sub>d</sub> | 4  | unknown | multigene | cluster     |
| OsIFCC018314 | PA <sub>d</sub> | 4  | unknown | multigene | cluster     |
| OsIFCC019950 | PA <sub>d</sub> | 5  | F       | multigene | non-cluster |
| OsIFCC022752 | PA <sub>d</sub> | 7  | C&F&P   | multigene | non-cluster |
| OsIFCC022753 | PA <sub>d</sub> | 7  | C&F&P   | multigene | non-cluster |
| OsIFCC023891 | PA <sub>d</sub> | 7  | unknown | multigene | non-cluster |
| OsIFCC024322 | PA <sub>d</sub> | 7  | F       | multigene | non-cluster |
| OsIFCC025333 | PA <sub>d</sub> | 8  | F       | multigene | non-cluster |
| OsIFCC025460 | PA <sub>d</sub> | 8  | C&F&P   | multigene | non-cluster |
| OsIFCC030074 | PA <sub>d</sub> | 10 | C&F&P   | multigene | non-cluster |
| OsIFCC030144 | PA <sub>d</sub> | 10 | P       | multigene | non-cluster |
| OsIFCC030145 | PA <sub>d</sub> | 10 | unknown | multigene | non-cluster |
| OsIFCC031257 | PA <sub>d</sub> | 10 | C&F     | multigene | non-cluster |
| OsIFCC032899 | PA <sub>d</sub> | 12 | C&F&P   | multigene | non-cluster |
| OsIFCC034368 | PA <sub>d</sub> | 11 | C&F     | multigene | non-cluster |
| OsIFCC034371 | PA <sub>d</sub> | 11 | C&F&P   | multigene | non-cluster |
| OsIFCC034372 | PA <sub>d</sub> | 11 | F&P     | multigene | non-cluster |
| OsIFCC034503 | PA <sub>d</sub> | 11 | F       | multigene | non-cluster |
| OsIFCC034577 | PA <sub>d</sub> | 11 | unknown | multigene | non-cluster |
| OsIFCC036035 | PA <sub>d</sub> | 11 | unknown | multigene | non-cluster |
| OsIFCC036518 | PA <sub>d</sub> | 1  | P       | multigene | cluster     |
| OsIFCC038440 | PA <sub>d</sub> | 3  | unknown | multigene | cluster     |
| OsIFSC046501 | PA <sub>d</sub> | NF | F&P     | multigene | non-cluster |

**Genes in *R*-gene family in Nipponbare**

|           |    |    |                |        |         |
|-----------|----|----|----------------|--------|---------|
| AC135190a | PA | 11 | <i>R</i> -gene | single | cluster |
| AC135497b | PA | 11 | <i>R</i> -gene | single | cluster |
| AP005257  | PA | 7  | <i>R</i> -gene | single | cluster |
| CC002584  | PA | 11 | <i>R</i> -gene | single | cluster |
| CC005649  | PA | 2  | <i>R</i> -gene | single | cluster |
| CC019339  | PA | 6  | <i>R</i> -gene | single | cluster |
| CC019340  | PA | 6  | <i>R</i> -gene | single | cluster |
| CC021577  | PA | 8  | <i>R</i> -gene | single | cluster |



|           |                 |    |                |           |             |
|-----------|-----------------|----|----------------|-----------|-------------|
| CC021945  | PA              | 11 | <i>R</i> -gene | single    | cluster     |
| CC022580  | PA              | 8  | <i>R</i> -gene | single    | cluster     |
| CC023500  | PA              | 8  | <i>R</i> -gene | single    | cluster     |
| CC023501  | PA              | 8  | <i>R</i> -gene | single    | cluster     |
| CC025363  | PA              | 7  | <i>R</i> -gene | single    | cluster     |
| CC025364  | PA              | 7  | <i>R</i> -gene | single    | cluster     |
| CC027095  | PA              | 11 | <i>R</i> -gene | single    | cluster     |
| CC027099  | PA              | 11 | <i>R</i> -gene | single    | cluster     |
| CC027114  | PA              | 11 | <i>R</i> -gene | single    | cluster     |
| CC027129  | PA              | 11 | <i>R</i> -gene | single    | cluster     |
| CC027318  | PA              | 11 | <i>R</i> -gene | single    | cluster     |
| CC028567  | PA              | 11 | <i>R</i> -gene | single    | cluster     |
| CC031194  | PA              | 12 | <i>R</i> -gene | single    | cluster     |
| CC038058  | PA              | 5  | <i>R</i> -gene | single    | cluster     |
| CC040847  | PA              | 7  | <i>R</i> -gene | single    | cluster     |
| CC041278  | PA              | 11 | <i>R</i> -gene | single    | cluster     |
| CC041574  | PA              | 11 | <i>R</i> -gene | single    | cluster     |
| CC042530  | PA              | 12 | <i>R</i> -gene | single    | cluster     |
| AC114011a | PA              | 11 | <i>R</i> -gene | single    | non-cluster |
| AC135957  | PA              | 11 | <i>R</i> -gene | single    | non-cluster |
| AP004555a | PA              | 8  | <i>R</i> -gene | single    | non-cluster |
| CC001216  | PA              | 1  | <i>R</i> -gene | single    | non-cluster |
| CC005555  | PA              | 2  | <i>R</i> -gene | single    | non-cluster |
| CC005653  | PA              | 2  | <i>R</i> -gene | single    | non-cluster |
| CC015953  | PA              | 4  | <i>R</i> -gene | single    | non-cluster |
| CC019293  | PA              | 6  | <i>R</i> -gene | single    | non-cluster |
| CC022665  | PA              | 8  | <i>R</i> -gene | single    | non-cluster |
| CC024939  | PA              | 7  | <i>R</i> -gene | single    | non-cluster |
| CC027323  | PA              | 11 | <i>R</i> -gene | single    | non-cluster |
| CC032900  | PA              | 10 | <i>R</i> -gene | single    | non-cluster |
| CC036156  | PA              | 2  | <i>R</i> -gene | single    | non-cluster |
| CC038372  | PA              | 4  | <i>R</i> -gene | single    | non-cluster |
| CC041795  | PA              | 9  | <i>R</i> -gene | single    | non-cluster |
| CC042517  | PA              | 12 | <i>R</i> -gene | single    | non-cluster |
| CC042758  | PA              | 10 | <i>R</i> -gene | single    | non-cluster |
| AL607003  | PA <sub>d</sub> | 4  | <i>R</i> -gene | multigene | cluster     |
| AL713909b | PA <sub>d</sub> | 12 | <i>R</i> -gene | multigene | cluster     |
| AP003368d | PA <sub>d</sub> | 1  | <i>R</i> -gene | multigene | cluster     |
| AP005501d | PA <sub>d</sub> | 8  | <i>R</i> -gene | multigene | cluster     |
| CC000083  | PA <sub>d</sub> | 1  | <i>R</i> -gene | multigene | cluster     |
| CC012075  | PA <sub>d</sub> | 3  | <i>R</i> -gene | multigene | cluster     |
| CC013868  | PA <sub>d</sub> | 2  | <i>R</i> -gene | multigene | cluster     |
| CC019239  | PA <sub>d</sub> | 6  | <i>R</i> -gene | multigene | cluster     |
| CC020989  | PA <sub>d</sub> | 5  | <i>R</i> -gene | multigene | cluster     |

|          |                 |    |                |           |             |
|----------|-----------------|----|----------------|-----------|-------------|
| CC020992 | PA <sub>d</sub> | 6  | <i>R</i> -gene | multigene | cluster     |
| CC026082 | PA <sub>d</sub> | 7  | <i>R</i> -gene | multigene | cluster     |
| CC027124 | PA <sub>d</sub> | 11 | <i>R</i> -gene | multigene | cluster     |
| CC028187 | PA <sub>d</sub> | 11 | <i>R</i> -gene | multigene | cluster     |
| CC028189 | PA <sub>d</sub> | 9  | <i>R</i> -gene | multigene | cluster     |
| CC028270 | PA <sub>d</sub> | 11 | <i>R</i> -gene | multigene | cluster     |
| CC028539 | PA <sub>d</sub> | 11 | <i>R</i> -gene | multigene | cluster     |
| CC029261 | PA <sub>d</sub> | 9  | <i>R</i> -gene | multigene | cluster     |
| CC032223 | PA <sub>d</sub> | 12 | <i>R</i> -gene | multigene | cluster     |
| CC032225 | PA <sub>d</sub> | 12 | <i>R</i> -gene | multigene | non-cluster |
| CC037657 | PA <sub>d</sub> | 3  | <i>R</i> -gene | multigene | cluster     |
| CC041286 | PA <sub>d</sub> | 5  | <i>R</i> -gene | multigene | cluster     |

**Genes in *R*-gene family in 93-11**

|                |    |    |                |        |             |
|----------------|----|----|----------------|--------|-------------|
| AAAA01000862_6 | PA | NF | <i>R</i> -gene | single | ND          |
| AAAA01000924_4 | PA | 7  | <i>R</i> -gene | single | cluster     |
| AAAA01001274_5 | PA | 1  | <i>R</i> -gene | single | cluster     |
| AAAA01001660_1 | PA | 7  | <i>R</i> -gene | single | non-cluster |
| AAAA01001715_5 | PA | 10 | <i>R</i> -gene | single | non-cluster |
| AAAA01001765_1 | PA | 2  | <i>R</i> -gene | single | cluster     |
| AAAA01001765_5 | PA | 2  | <i>R</i> -gene | single | cluster     |
| AAAA01001803_4 | PA | 5  | <i>R</i> -gene | single | non-cluster |
| AAAA01003047_1 | PA | 4  | <i>R</i> -gene | single | cluster     |
| AAAA01003554_4 | PA | 2  | <i>R</i> -gene | single | non-cluster |
| AAAA01003777_3 | PA | 8  | <i>R</i> -gene | single | non-cluster |
| AAAA01004171_1 | PA | NF | <i>R</i> -gene | single | ND          |
| AAAA01004234_2 | PA | NF | <i>R</i> -gene | single | ND          |
| AAAA01004624_1 | PA | 11 | <i>R</i> -gene | single | cluster     |
| AAAA01004640_3 | PA | 11 | <i>R</i> -gene | single | cluster     |
| AAAA01005128_1 | PA | 7  | <i>R</i> -gene | single | cluster     |
| AAAA01005471_1 | PA | 8  | <i>R</i> -gene | single | cluster     |
| AAAA01005607_1 | PA | 3  | <i>R</i> -gene | single | non-cluster |
| AAAA01005808_1 | PA | 12 | <i>R</i> -gene | single | cluster     |
| AAAA01006940_2 | PA | 1  | <i>R</i> -gene | single | cluster     |
| AAAA01009049_1 | PA | 6  | <i>R</i> -gene | single | cluster     |
| AAAA01009621_2 | PA | NF | <i>R</i> -gene | single | ND          |
| AAAA01009698_1 | PA | 11 | <i>R</i> -gene | single | cluster     |
| AAAA01009793_1 | PA | 7  | <i>R</i> -gene | single | cluster     |
| AAAA01010257_1 | PA | 6  | <i>R</i> -gene | single | non-cluster |
| AAAA01010541_2 | PA | 8  | <i>R</i> -gene | single | non-cluster |
| AAAA01010924_1 | PA | 9  | <i>R</i> -gene | single | non-cluster |
| AAAA01010962_1 | PA | 11 | <i>R</i> -gene | single | cluster     |
| AAAA01011627_1 | PA | 11 | <i>R</i> -gene | single | cluster     |
| AAAA01013177_1 | PA | 12 | <i>R</i> -gene | single | non-cluster |
| AAAA01013445_1 | PA | 5  | <i>R</i> -gene | single | cluster     |

|                |    |       |                |           |             |
|----------------|----|-------|----------------|-----------|-------------|
| AAAA01014728_1 | PA | 7     | <i>R</i> -gene | single    | cluster     |
| AAAA01016026_1 | PA | 6     | <i>R</i> -gene | single    | non-cluster |
| OsIFCC002166   | PA | 4     | <i>R</i> -gene | single    | cluster     |
| OsIFCC006484   | PA | 3     | <i>R</i> -gene | single    | non-cluster |
| OsIFCC007375   | PA | 3     | <i>R</i> -gene | single    | cluster     |
| OsIFCC007377   | PA | 3     | <i>R</i> -gene | single    | cluster     |
| OsIFCC010265   | PA | 6     | <i>R</i> -gene | single    | cluster     |
| OsIFCC011502   | PA | 2     | <i>R</i> -gene | single    | non-cluster |
| OsIFCC012619   | PA | 2     | <i>R</i> -gene | single    | non-cluster |
| OsIFCC016966   | PA | 4     | <i>R</i> -gene | single    | non-cluster |
| OsIFCC023445   | PA | 7     | <i>R</i> -gene | single    | cluster     |
| OsIFCC033126   | PA | 12    | <i>R</i> -gene | single    | non-cluster |
| OsIFCC033585   | PA | 12    | <i>R</i> -gene | single    | cluster     |
| OsIFCC033812   | PA | 12    | <i>R</i> -gene | single    | non-cluster |
| OsIFCC034390   | PA | 11    | <i>R</i> -gene | single    | non-cluster |
| OsIFCC034501   | PA | 11    | <i>R</i> -gene | single    | non-cluster |
| OsIFCC034563   | PA | 11    | <i>R</i> -gene | single    | cluster     |
| OsIFCC035221   | PA | 11    | <i>R</i> -gene | single    | cluster     |
| OsIFCC035693   | PA | 11    | <i>R</i> -gene | single    | cluster     |
| OsIFCC035753   | PA | 11    | <i>R</i> -gene | single    | cluster     |
| OsIFCC035768   | PA | 11    | <i>R</i> -gene | single    | non-cluster |
| OsIFCC035797   | PA | 11    | <i>R</i> -gene | single    | cluster     |
| OsIFCC035800   | PA | 11    | <i>R</i> -gene | single    | non-cluster |
| OsIFCC036063   | PA | 11    | <i>R</i> -gene | single    | non-cluster |
| OsIFSC046148   | PA | NF    | <i>R</i> -gene | single    | ND          |
| OsIFSC046157   | PA | 11    | <i>R</i> -gene | single    | cluster     |
| OsIFSC046157   | PA | 11    | <i>R</i> -gene | single    | cluster     |
| OsIFSC046867   | PA | ChrUn | <i>R</i> -gene | single    | ND          |
| OsIFSC046976   | PA | ChrUn | <i>R</i> -gene | single    | ND          |
| OsIFSC047074   | PA | ChrUn | <i>R</i> -gene | single    | ND          |
| OsIFSC047502   | PA | ChrUn | <i>R</i> -gene | single    | ND          |
| AAAA02012175   | AL | 4     | <i>R</i> -gene | single    | non-cluster |
| AAAA02011393   | AL | 3     | <i>R</i> -gene | multigene | cluster     |
| AAAA02006137   | AL | 2     | <i>R</i> -gene | single    | non-cluster |
| AAAA02005670   | AL | 2     | <i>R</i> -gene | single    | non-cluster |
| AAAA02011796   | AL | 4     | <i>R</i> -gene | single    | non-cluster |
| AAAA02008304   | AL | 3     | <i>R</i> -gene | single    | non-cluster |
| AAAA02029432   | AL | 10    | <i>R</i> -gene | single    | cluster     |
| AAAA01009531_2 | AL | 10    | <i>R</i> -gene | multigene | cluster     |
| AAAA02012853   | AL | 4     | <i>R</i> -gene | single    | cluster     |
| AAAA02028520   | AL | 10    | <i>R</i> -gene | single    | non-cluster |
| AAAA02015947_1 | AL | 5     | <i>R</i> -gene | multigene | cluster     |
| AAAA02015947_2 | AL | 5     | <i>R</i> -gene | single    | cluster     |
| AAAA02002233   | AL | 1     | <i>R</i> -gene | single    | cluster     |

|                |    |       |                |           |             |
|----------------|----|-------|----------------|-----------|-------------|
| AAAA02019574   | AL | 6     | <i>R</i> -gene | single    | non-cluster |
| AAAA02023008   | AL | 8     | <i>R</i> -gene | single    | non-cluster |
| AAAA02027233   | AL | 9     | <i>R</i> -gene | single    | cluster     |
| AAAA02031031   | AL | 11    | <i>R</i> -gene | single    | cluster     |
| AAAA02031042   | AL | 11    | <i>R</i> -gene | single    | cluster     |
| AAAA02031967   | AL | 11    | <i>R</i> -gene | single    | cluster     |
| AAAA02033127_2 | AL | 11    | <i>R</i> -gene | single    | cluster     |
| AAAA02034638   | AL | 12    | <i>R</i> -gene | single    | non-cluster |
| AAAA02034655   | AL | 12    | <i>R</i> -gene | single    | cluster     |
| AAAA02035717   | AL | ChrUn | <i>R</i> -gene | single    | cluster     |
| OsIFCC005137   | AL | 3     | <i>R</i> -gene | single    | cluster     |
| OsIFCC005138   | AL | 3     | <i>R</i> -gene | multigene | cluster     |
| OsIFCC005153   | AL | 3     | <i>R</i> -gene | single    | cluster     |
| OsIFCC009427   | AL | 6     | <i>R</i> -gene | single    | cluster     |
| OsIFCC009428   | AL | 6     | <i>R</i> -gene | multigene | cluster     |
| OsIFCC010261   | AL | 6     | <i>R</i> -gene | single    | cluster     |
| OsIFCC011501   | AL | 6     | <i>R</i> -gene | multigene | non-cluster |
| OsIFCC011506   | AL | 6     | <i>R</i> -gene | multigene | cluster     |
| OsIFCC012956   | AL | 2     | <i>R</i> -gene | single    | cluster     |
| OsIFCC016816   | AL | 4     | <i>R</i> -gene | multigene | cluster     |
| OsIFCC017218   | AL | 4     | <i>R</i> -gene | multigene | cluster     |
| OsIFCC019876   | AL | 5     | <i>R</i> -gene | single    | non-cluster |
| OsIFCC019892   | AL | 5     | <i>R</i> -gene | multigene | cluster     |
| OsIFCC019896   | AL | 5     | <i>R</i> -gene | single    | cluster     |
| OsIFCC020204   | AL | 5     | <i>R</i> -gene | multigene | cluster     |
| OsIFCC020233   | AL | 5     | <i>R</i> -gene | multigene | cluster     |
| OsIFCC020397   | AL | 5     | <i>R</i> -gene | single    | cluster     |
| OsIFCC020845   | AL | 5     | <i>R</i> -gene | single    | cluster     |
| OsIFCC023859   | AL | 7     | <i>R</i> -gene | single    | cluster     |
| OsIFCC025328   | AL | 8     | <i>R</i> -gene | multigene | cluster     |
| OsIFCC026178   | AL | 8     | <i>R</i> -gene | single    | non-cluster |
| OsIFCC027453   | AL | 8     | <i>R</i> -gene | single    | cluster     |
| OsIFCC029246   | AL | 9     | <i>R</i> -gene | multigene | cluster     |
| OsIFCC029808   | AL | 10    | <i>R</i> -gene | single    | cluster     |
| OsIFCC029848   | AL | 10    | <i>R</i> -gene | single    | cluster     |
| OsIFCC034567   | AL | 11    | <i>R</i> -gene | multigene | cluster     |
| OsIFCC035230   | AL | 11    | <i>R</i> -gene | single    | cluster     |
| OsIFCC035961   | AL | 11    | <i>R</i> -gene | single    | non-cluster |
| OsIFCC036006   | AL | 11    | <i>R</i> -gene | multigene | cluster     |
| OsIFCC036043   | AL | 11    | <i>R</i> -gene | multigene | cluster     |
| OsIFCC036049   | AL | 11    | <i>R</i> -gene | multigene | cluster     |
| OsIFCC036537   | AL | 1     | <i>R</i> -gene | single    | non-cluster |
| OsIFCC041626   | AL | 5     | <i>R</i> -gene | multigene | cluster     |
| OsIFCC042075   | AL | 7     | <i>R</i> -gene | single    | cluster     |

|                |                 |    |                |           |             |
|----------------|-----------------|----|----------------|-----------|-------------|
| OsIFCC043691   | AL              | 9  | <i>R</i> -gene | single    | cluster     |
| AAAA02021242   | PA <sub>d</sub> | 7  | <i>R</i> -gene | multigene | cluster     |
| AAAA02005199   | PA <sub>d</sub> | 2  | <i>R</i> -gene | multigene | cluster     |
| AAAA02034526   | PA <sub>d</sub> | 12 | <i>R</i> -gene | multigene | cluster     |
| AAAA02014792   | PA <sub>d</sub> | 4  | <i>R</i> -gene | multigene | cluster     |
| AAAA02015914   | PA <sub>d</sub> | 5  | <i>R</i> -gene | multigene | cluster     |
| AAAA02033186   | PA <sub>d</sub> | 11 | <i>R</i> -gene | multigene | cluster     |
| AAAA02034995   | PA <sub>d</sub> | 12 | <i>R</i> -gene | multigene | cluster     |
| AAAA01016632_1 | PA <sub>d</sub> | 8  | <i>R</i> -gene | multigene | cluster     |
| OsIFCC009553   | PA <sub>d</sub> | 6  | <i>R</i> -gene | multigene | cluster     |
| OsIFCC020218   | PA <sub>d</sub> | 5  | <i>R</i> -gene | multigene | non-cluster |
| OsIFCC020874   | PA <sub>d</sub> | 5  | <i>R</i> -gene | multigene | non-cluster |
| OsIFCC029249   | PA <sub>d</sub> | 9  | <i>R</i> -gene | multigene | cluster     |
| OsIFCC033204   | PA <sub>d</sub> | 12 | <i>R</i> -gene | multigene | cluster     |
| OsIFCC035222   | PA <sub>d</sub> | 11 | <i>R</i> -gene | multigene | cluster     |
| OsIFCC035984   | PA <sub>d</sub> | 11 | <i>R</i> -gene | multigene | cluster     |
| OsIFCC036010   | PA <sub>d</sub> | 11 | <i>R</i> -gene | multigene | cluster     |
| OsIFCC036026   | PA <sub>d</sub> | 11 | <i>R</i> -gene | multigene | non-cluster |
| OsIFCC039636   | PA <sub>d</sub> | 2  | <i>R</i> -gene | multigene | cluster     |
| OsIFCC042307   | PA <sub>d</sub> | 7  | <i>R</i> -gene | multigene | non-cluster |
| OsIFCC045762   | PA <sub>d</sub> | 11 | <i>R</i> -gene | multigene | cluster     |
| OsIFSC046529   | PA <sub>d</sub> | 11 | <i>R</i> -gene | multigene | cluster     |

**Genes in *RLK* gene family in Nipponbare**

|             |    |    |        |           |             |
|-------------|----|----|--------|-----------|-------------|
| 3778.m00100 | PA | 2  | Kinase | single    | cluster     |
| 5928.m00110 | PA | 9  | Kinase | single    | non-cluster |
| 6247.m00042 | PA | 2  | Kinase | single    | non-cluster |
| 7014.m00090 | PA | 7  | Kinase | single    | non-cluster |
| 1947.m00139 | AL | 6  | Kinase | single    | cluster     |
| 1954.m00189 | AL | 6  | Kinase | single    | cluster     |
| 2493.m00131 | AL | 2  | Kinase | multigene | cluster     |
| 2493.m00133 | AL | 2  | Kinase | multigene | cluster     |
| 2507.m00094 | AL | 2  | Kinase | multigene | cluster     |
| 2712.m00179 | AL | 1  | Kinase | multigene | cluster     |
| 2872.m00058 | AL | 1  | Kinase | multigene | non-cluster |
| 2942.m00117 | AL | 2  | Kinase | single    | non-cluster |
| 2973.m00130 | AL | 5  | Kinase | single    | non-cluster |
| 3181.m00133 | AL | 10 | Kinase | single    | cluster     |
| 3778.m00106 | AL | 2  | Kinase | single    | non-cluster |
| 3841.m00143 | AL | 2  | Kinase | multigene | cluster     |
| 3852.m00140 | AL | 2  | Kinase | single    | cluster     |
| 3852.m00143 | AL | 2  | Kinase | multigene | cluster     |
| 3852.m00146 | AL | 2  | Kinase | multigene | cluster     |
| 4279.m00143 | AL | 2  | Kinase | multigene | cluster     |
| 4440.m00144 | AL | 1  | Kinase | single    | cluster     |

|             |    |    |        |           |             |
|-------------|----|----|--------|-----------|-------------|
| 5104.m00185 | AL | 6  | Kinase | multigene | cluster     |
| 5168.m00126 | AL | 8  | Kinase | multigene | non-cluster |
| 5500.m00225 | AL | 4  | Kinase | multigene | non-cluster |
| 5531.m00139 | AL | 4  | Kinase | single    | non-cluster |
| 5928.m00133 | AL | 9  | Kinase | single    | non-cluster |
| 6103.m00140 | AL | 10 | Kinase | single    | non-cluster |
| 6242.m00122 | AL | 9  | Kinase | single    | cluster     |
| 6324.m00130 | AL | 11 | Kinase | multigene | cluster     |
| 6324.m00132 | AL | 11 | Kinase | single    | cluster     |
| 6324.m00133 | AL | 11 | Kinase | multigene | cluster     |
| 6324.m00134 | AL | 11 | Kinase | multigene | cluster     |
| 6324.m00144 | AL | 11 | Kinase | multigene | cluster     |
| 6324.m00146 | AL | 11 | Kinase | multigene | cluster     |
| 6498.m00140 | AL | 6  | Kinase | single    | non-cluster |
| 6522.m00161 | AL | 11 | Kinase | single    | cluster     |
| 6574.m00049 | AL | 6  | Kinase | single    | cluster     |
| 6592.m00198 | AL | 6  | Kinase | multigene | cluster     |
| 6592.m00214 | AL | 6  | Kinase | multigene | cluster     |
| 6592.m00220 | AL | 6  | Kinase | multigene | cluster     |
| 6850.m00166 | AL | 11 | Kinase | multigene | cluster     |
| 6850.m00171 | AL | 11 | Kinase | multigene | cluster     |
| 6850.m00174 | AL | 11 | Kinase | multigene | cluster     |
| 6850.m00176 | AL | 11 | Kinase | multigene | cluster     |
| 6927.m00147 | AL | 8  | Kinase | single    | non-cluster |
| 6958.m00101 | AL | 8  | Kinase | multigene | non-cluster |
| 6983.m00134 | AL | 1  | Kinase | single    | cluster     |
| 7342.m00113 | AL | 11 | Kinase | multigene | cluster     |
| 7396.m00099 | AL | 11 | Kinase | single    | non-cluster |
| 8186.m00129 | AL | 4  | Kinase | single    | non-cluster |
| 8186.m00131 | AL | 4  | Kinase | multigene | cluster     |
| 8186.m00132 | AL | 4  | Kinase | multigene | cluster     |
| 8210.m00132 | AL | 4  | Kinase | single    | non-cluster |
| 8221.m00128 | AL | 2  | Kinase | multigene | cluster     |
| 8288.m00116 | AL | 4  | Kinase | multigene | cluster     |

**Genes in *RLK* gene family in 93-11**

|          |    |   |        |           |             |
|----------|----|---|--------|-----------|-------------|
| CC009562 | PA | 6 | Kinase | single    | cluster     |
| CC009564 | PA | 6 | Kinase | single    | cluster     |
| CC011260 | PA | 6 | Kinase | single    | cluster     |
| CC014664 | PA | 2 | Kinase | multigene | cluster     |
| CC014665 | PA | 2 | Kinase | multigene | cluster     |
| CC014690 | PA | 2 | Kinase | single    | non-cluster |
| CC017094 | PA | 4 | Kinase | single    | cluster     |
| CC021621 | PA | 5 | Kinase | single    | cluster     |
| CC021622 | PA | 5 | Kinase | single    | cluster     |

|                                                  |    |    |                      |           |             |
|--------------------------------------------------|----|----|----------------------|-----------|-------------|
| CC033150                                         | PA | 12 | Kinase               | single    | non-cluster |
| CC035782                                         | PA | 11 | Kinase               | multigene | non-cluster |
| CC035790                                         | PA | 11 | Kinase               | multigene | non-cluster |
| CC036052                                         | PA | 11 | Kinase               | single    | cluster     |
| <b>Genes in <i>Myb</i> gene family in 93-11</b>  |    |    |                      |           |             |
| CC020386                                         | PA | 5  | transcription factor | single    | ND          |
| CC028541                                         | PA | 9  | transcription factor | single    | ND          |
| CC032332                                         | PA | 12 | transcription factor | single    | ND          |
| AAAA02030895                                     | AL | 11 | transcription factor | single    | non-cluster |
| <b>Genes in <i>MADS</i> gene family in 93-11</b> |    |    |                      |           |             |
| CC001468                                         | PA | 1  | transcription factor | single    | ND          |
| CC008363                                         | PA | 3  | transcription factor | single    | ND          |
| CC016421                                         | PA | 4  | transcription factor | single    | ND          |
| AAAA02034103                                     | AL | 12 | transcription factor | multigene | non-cluster |

---

<sup>a</sup> GO Categories, P: biological\_process; C: cellular\_component; F: molecular\_function.

<sup>b</sup> Contigs that included in the short-gun sequence database but cannot be found in the chromosome database of 93-11.

<sup>c</sup> The GO Category of the gene has not been determined.
