# Supplementary material for: Highly asymmetric rice genomes
Source: PubMed Central journal article supplement (PMC1914357; doi:10.1186/1471-2164-8-154), 2007-06-08
Supplement: 1471-2164-8-154-S2.pdf [file 1471-2164-8-154-S2.pdf]

**Table S2: The total percentage of TE homologous sequences in symmetric (allelic) and asymmetric (PA, PA<sub>d</sub> and AL) genes on chromosome 10.**

| TE%<br>(length) <sup>a</sup> | Genes in Nipponbare |         |                 |         | Genes in 93-11 |         |                 |         |
|------------------------------|---------------------|---------|-----------------|---------|----------------|---------|-----------------|---------|
|                              | Allelic             | PA      | PA <sub>d</sub> | AL      | Allelic        | PA      | PA <sub>d</sub> | AL      |
| 0                            | 9(8%) <sup>b</sup>  | 8(14%)  | 5(10%)          | 6(9%)   | 4(3%)          | 2(3%)   | 4(6%)           | 1(2%)   |
| 0-5%                         | 44(37%)             | 9(16%)  | 15(31%)         | 15(23%) | 57(45%)        | 33(49%) | 29(40%)         | 14(30%) |
| 5%-10%                       | 27(23%)             | 22(39%) | 14(29%)         | 22(34%) | 35(28%)        | 17(25%) | 13(18%)         | 13(28%) |
| 10%-20%                      | 28(23%)             | 12(21%) | 7(14%)          | 14(22%) | 22(17%)        | 9(13%)  | 21(29%)         | 10(22%) |
| >20%                         | 12(10%)             | 5(9%)   | 8(16%)          | 7(11%)  | 8(6%)          | 7(10%)  | 5(7%)           | 8(17%)  |
| Total genes                  | 120                 | 56      | 49              | 64      | 126            | 68      | 72              | 46      |

<sup>a</sup> The proportion of TE-related fragments (the total length of all small pieces of TE homologous sequences contained in a gene divided by the length of this gene).

<sup>b</sup> The first number is the amount of the genes within each range with its corresponding percentage in brackets.

**Table S3: The sequence sizes and numbers of non-alignable regions (insertions) in Nipponbare and 93-11 on chromosome 10.**

| Nip. insertion length | 93-11 insertion length |           |           |            |           |           |
|-----------------------|------------------------|-----------|-----------|------------|-----------|-----------|
|                       | <0bp                   | 0-300bp   | 300bp-1kb | 1kb-5kb    | 5kb-10kb  | >10kb     |
| <0bp                  | /                      | 6         | 151       | <b>183</b> | <b>56</b> | <b>61</b> |
| 0-300bp               | 11                     | 4         | 34        | <b>81</b>  | <b>19</b> | <b>25</b> |
| 300bp-1kb             | 151                    | 34        | 18        | <b>47</b>  | <b>16</b> | <b>13</b> |
| 1kb-5kb               | <b>171</b>             | <b>31</b> | <b>16</b> | 52         | 22        | 25        |
| 5kb-10kb              | <b>64</b>              | <b>11</b> | <b>8</b>  | 20         | 15        | 16        |
| >10kb                 | <b>59</b>              | <b>5</b>  | <b>9</b>  | 23         | 18        | 60        |

Note. The bolded numbers represent the insertions and the others (>1 kb) stand for the non-alignable regions which were used in this study.

**Table S4: Primer information for the amplification of gene fragments in Table 3.**

| NO. | Gene         | Length | Reverse primer (5' to 3')                        |
|-----|--------------|--------|--------------------------------------------------|
| 1   | OsIFCC009208 | 832bp  | GACAATTCAGGGAGGTTACGG<br>GAGCGAGCAGAAGCAGTGG     |
| 2   | OsIFCC035754 | 828bp  | AAGGTGAAAGTGTGGAGGAGAT<br>CAGAGGTTGGGGATTTCGTAG  |
| 3   | OsIFSC047991 | 1078bp | CATGCGACGAAGGTTGACTA<br>GAGGGAGTGCTTTGGTGTCA     |
| 4   | OsIFCC019895 | 859bp  | GAACAAGAAGGGGCGGTGAA<br>GCAGGTGTCGCAATGGTGAA     |
| 5   | OsIFCC035751 | 831bp  | TTACGAGATTCCAAGAGACCAA<br>TCCACCAGAGTTTCCATCAAG  |
| 6   | OsIFCC035229 | 1013bp | GTTTTGCGAGTATTGGATGTTG<br>ATTGGATTGTTGGGATTATTGA |
| 7   | OsIFCC043050 | 1001bp | ACAACAAGAGCCCCCATAGC<br>CGTCTCCAACATCGGCATAG     |
| 8   | OsIFCC045542 | 986bp  | CCATTCTCTGCCTTCCTCTACC<br>TGCTTTTCAGTGTCAACCTCTC |
| 9   | OsIFCC023444 | 917bp  | GGATGCTTGGGGTCAGATTT<br>CAGTGCTCATTTCGTCATTGT    |
| 10  | OsIFCC026523 | 1062bp | CCCTTCTTTGGTGGCATTCA<br>GGGTGGTTGGGATGAGTGCT     |
| 11  | OsIFSC046156 | 782bp  | AGGGAGGAGCCATCTTCTATT<br>TTCCGCCTTCACCTAATGTC    |
| 12  | Os12g31620   | 708bp  | CCTCCGCCACCTGTCTGTAA<br>CGTGCCAAGCCCCTAATGAA     |
| 13  | Os11g45330   | 1089bp | GTTGATTTGTGCCGAAGAGA<br>ATGCCACGGAGGTTTATTAGA    |
| 14  | Os06g16790   | 928bp  | GAGCTTAGGCGGGAGAAATCAC<br>CACCTTTCCAGCCATCCTCTAC |
| 15  | Os12g09730   | 1099bp | ACGAGCAGCGACGAATCAAG<br>GCGAGGAGGGCACACAGAA      |
| 16  | Os10g04670   | 1014bp | GTGAGTTGGCGATTGACCTG<br>GATTAGGCAAGTCCCCGAGT     |
| 17  | Os11g11550   | 844bp  | TTGTTTCCTCGCCTGATGGT<br>AAACGCCAGAGCAGCATCTTA    |
| 18  | Os12g28250   | 1004bp | GGCACCTACGCTCCTTGAT<br>TGGCTGTCACTTCAACCTCT      |
| 19  | Os11g15670   | 1029bp | TACATTGCCGCTACTGGGAG<br>AAAGGCATTCTTGGGCAGAG     |
| 20  | Os01g20720   | 1077bp | GCGGTGTTCTCTGACGATA<br>GTTCTGCCACTCCTGCTGTC      |
| 21  | Os12g18360   | 992bp  | AATGCACATGATACAACACCACT                          |

---

|    |              |        |                                                                         |
|----|--------------|--------|-------------------------------------------------------------------------|
| 22 | Os04g41370   | 942bp  | AGCCACGGCAGAGAAAGAAAG<br>AATCACAGACATCCCAGAAGAA<br>GTGCCATCATCCCCATAGAA |
| 23 | Os07g29820   | 1061bp | ACAGATAGGTAGAGCCGAGAA<br>ACAAGTGGGCAGCAACAAA                            |
| 24 | Os02g25900   | 970bp  | AAAGCAGCAGATGAGCCTAAG<br>AGTGGCCGATGATGATGAAG                           |
| 25 | OsIFCC040819 | 561bp  | GGGTGGAGTGGGCAAGACAAC<br>TTGAACGACAGCAGGCGACC                           |
| 26 | Os12g37270   | 921bp  | AGCAACTGGAAGGGAGATAAG<br>AACATCGTGCTCCAATAGCCT                          |
| 27 | Os12g03750   | 1068bp | GGGAGGCAGTTATTTGATGAG<br>CTGGAAGAATTTGATGGTGAGT                         |
| 28 | Os01g57270   | 899bp  | CAAACAACCTGGAAACACAAC<br>AACTCTGGAACAACGAAACCT                          |
| 29 | Os05g16180   | 904bp  | GCAGATGGTGAGTGGTGTAGTT<br>GCAGGTATCTTGGGAGTTGTT                         |
| 30 | Os08g10430   | 1060bp | AGCAAGTGCAAGGAGGATAA<br>TGGAGCTTGGGCATTACAC                             |
| 31 | Os01g05490   | 579bp  | TCAGCCCACCTTATGT<br>CACCACCGACGAGAAA                                    |
| 32 | Os03g61120   | 207bp  | AGGCTCGTGGTTGTATT<br>CAACATCATTCCTCCA                                   |
| 33 | Os05g49760   | 192bp  | TCGTCAGAAAGGTGGTG<br>CCGTGAACAAGCAGAGC                                  |

---
